# Supplementary material for: MicroRNA Alterations for Diagnosis, Prognosis, and Treatment of Osteoporosis: A Comprehensive Review and Computational Functional Survey
Source: PubMed Central journal article supplement (PMC7063117; doi:10.3389/fgene.2020.00181), 2020-03-03
Supplement: Image_1.pdf [file Image_1.pdf]

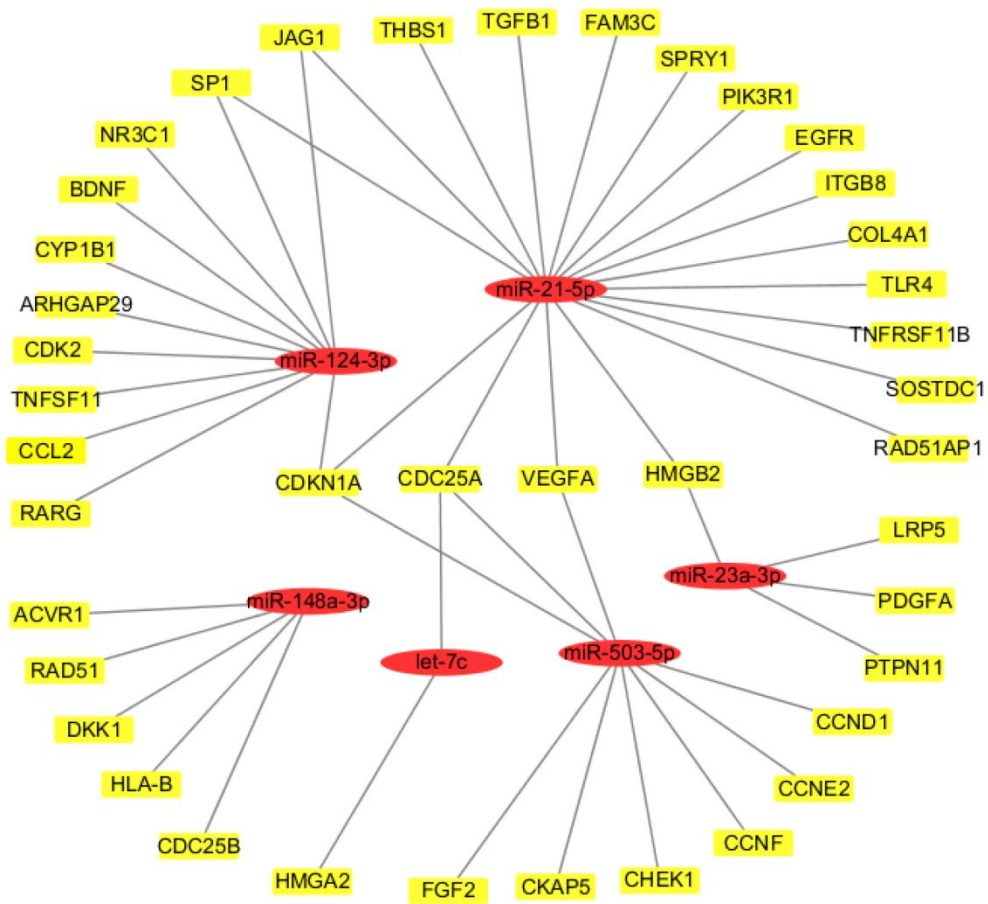

**Figure A1.** Six miRNAs and their targeted OP-associated genes. The selected six miRNAs are closely related to three well-studied OP pathways, i.e., estrogen–endocrine, WNT/ $\beta$ -catenin signaling, and RANKL/RANK/OPG. Red ellipses and yellow rectangles represent miRNAs and genes, respectively.
